# Supplementary material for: miR-8-3p regulates mitoferrin in the testes of Bactrocera dorsalis to ensure normal spermatogenesis
Source: PubMed Central journal article supplement (PMC4773865; doi:10.1038/srep22565), 2016-03-02
Supplement: srep22565-s1.pdf [file srep22565-s1.pdf]

## Supplementary information

**miR-8-3p regulates *mitoferrin* in the testes of *Bactrocera dorsalis* to ensure normal spermatogenesis.**

KaleemTariq<sup>a</sup>, Christoph Metzendorf<sup>b</sup>, Wei Peng<sup>a</sup>, Summar Sohail<sup>a</sup>, Hongyu Zhang<sup>a\*</sup>

<sup>a</sup>State Key Laboratory of Agricultural Microbiology, Hubei Key Laboratory of Insect Resource Application and Sustainable Pest Control, and Institute of Urban and Horticultural Entomology, College of Plant Science and Technology, Huazhong Agricultural University, Wuhan 430070, Hubei, People's Republic of China.

<sup>b</sup>Heidelberg University Biochemistry Center (BZH), University of Heidelberg, ImNeuenheimer Feld 328, Heidelberg, Germany.

\* Author to whom correspondence should be addressed;

E-Mail: hongyu.zhang@mail.hzau.edu.cn; Tel.: +86-027-8728-0276; Fax: +86-027-8728-0796.

## Supplementary Table

**Table S1.** miRNA mimics and antagomiRs used in this study.

## Supplementary Figure

**Figure S1: The putative *Bactrocera dorsalis* mitoferrin (bmfrn) amino acid sequence contains conserved histidine residues required for mitoferrin iron transport function.** Amino acid sequences from mitoferrins of *B. dorsalis* (GI: 751779949, NCBI), fruit fly (*dmfrn*, flybase), yeast (GI: 1008338 and GI: 486507, NCBI) and human (GI: 82775373 and GI: 149274643, NCBI) were aligned using CLC Main Workbench 6.9 (CLC bio, Denmark) using the “very accurate” setting. Conserved histidine residues required for mitoferrin iron transport function<sup>19</sup> are indicated by asterisks.

| <b>miRNA</b>                | <b>Sequence</b>          |
|-----------------------------|--------------------------|
| <b>Mimics</b>               |                          |
| miR-279-3p-sense strand     | UGACUAGAUCCACACUCAU      |
| miR-279-3p-antisense strand | GAUGAGUGUGGAUCUAGUCA     |
| miR-8-3-p-sense strand      | UAAUACUGUCAGGUAAGAUGUC   |
| miR-8-3-p-antisense strand  | ACAUCUUUACCUGACAGUAUUAU  |
| miR-275-3p-sense strand     | UCAGGUACCUGAAGUAGCGCGCG  |
| miR-275-3p-antisense strand | CGCGCUACUUCAGGUACCUGAUU  |
| miR-34-3p-sense strand      | CAGCCACUAUCUUCACUGCCGCC  |
| miR-34-3p-antisense strand  | CGGCAGUGAAGAUAGUGGCUGUU  |
| miR-304-5p-sense strand     | UAAUCUCAAUUUGUAAACUGUGA  |
| miR-304-5p-antisense strand | ACAGUUACAAAUUGAGAUUAUU   |
| N.C mimc-sense strand       | UUCUCCGAACGUGUCACGUTT    |
| N.C mimc-antisense strand   | ACGUGACACGUUCGGAGAATT    |
| <b>antagomiRs</b>           |                          |
| miR-8-3-p                   | AGACAUCUUUACCUGACAGUAUUA |
| N.C antagomiR               | CAGUACUUUUGUGUAGUACAA    |

**Table S1.** miRNA mimics and antagomiRs used in this study.

bmfrn ----- MNM 3  
 dmfrn ----- MNM 3  
 mfrn2 MELEGRGAGGVAGGPAAGPGRSPGESALLDGLQRFVGRGAGGGAGACRPPVQRDPDSG 60  
 mfrn1 ----- MELRSGSV - - GSAVARRMGDSDGGGGKDATGS 33  
 MRS3 ----- MVENSSSNSTRIPIAIPMDL 21  
 MRS4 ----- MNTSELSIAEEI - - - - - 12

Sequence logo  
 4.3bits  
 0.0bits MELEGRGAGGVAGGPAAGPGRSPGESALLDGLQRFVGRGAGGGAGACRPPVQRDPDSG

bmfrn DDYESLPT - TSVSINMTAGATAGVLEHCVMPYLDVSKTRMQSLSP - - MTSNYDISTTFKN 60  
 dmfrn DDYESLPT - TSVGNMTAGATAGVLEHVVMPYLDVSKTRMQSLSP - - PTKNMNIIVSTLRT 60  
 mfrn2 PDYEALPAGATVTTHMVAGAVAGLEHCVMPYLDVSKTRMQSLQDPAAARYRNVLEALWR 120  
 mfrn1 EDYENLPTSAVSTHMTAGAMAGLEHSMVMPYLDVSKTRMQSLSPDKAQYTSIYGAIKK 93  
 MRS3 PDYEALPTHAPLYHQLIAGAFAGIMEHSMVFPYLDVSKTRMQSLSPDKAQYTSIYGAIKK 80  
 MRS4 - DYEALPSHAPLHSQLLAGAFAGIMEHSLMFPYLDVSKTRVQAAGLN - KAASTGMIISQISK 70

Sequence logo  
 4.3bits  
 0.0bits DDYESLPT - TSVSINMTAGATAGVLEHCVMPYLDVSKTRMQSLSP - - MTSNYDISTTFKN

bmfrn MIKKEGIMRPIFGVSAVVAGAGPAHALYFGSYEMTKELTKFT - - TNNHVNYMASGATA 117  
 dmfrn MITREGLRPIFGASAVVAGAGPAHSLYFAAYEMTKELTAKFT - - SVNRLNVIYISGAVA 117  
 mfrn2 IIRTEGLWRPMEGLNVITAGAGPAHALYFACYEKKKTLSDVTHPGNSHIANGAAGCVA 180  
 mfrn1 IMRTEGLWRPMEGLNVIMGAGPAHAMYFACYENMKFTLNDVFHHQGNSHLANGIAGSMA 153  
 MRS3 ISTEGLTALWKGVSQSVILGAGPAHAYVFGTYEFCCKNLIDSSDTQTHHPFKTAISGACA 140  
 MRS4 ISTEGLTALWKGVSQSVILGAGPAHAYVFGTYEFCCKNLIDSSDTQTHHPFKTAISGATA 130

Sequence logo  
 4.3bits  
 0.0bits MIKKEGIMRPIFGVSAVVAGAGPAHALYFGSYEMTKELTKFT - - TNNHVNYMASGATA

bmfrn TLIHDAVSNPTFVIKQRMQMYNSKYNVSVISCMKDYRTEGLIQAFYRSYSTQLVMNIPLYQT 177  
 dmfrn TLIHDAVSSPTFVIKQRMQMYNSPYTSVSVSCVRFYKREGFKAIFYRAYGTQLVMNIPLYQT 177  
 mfrn2 TLLHDAAMNPAEVVKQRMQMYNSPYHRVTDVRAVWQNEGAGAFYRSYTTQLTMNYPQA 240  
 mfrn1 TLLHDAVMNPAEVVKQRMQMYNSQHRSAISCI RTVWRTEGLGAFYRSYTTQLTMNYPQS 213  
 MRS3 TIASDALMNPFDTIKQRIQLNTSA - - SVWQTTKQIYQSEGLAAFYYSYPTTLVMNIPFAA 198  
 MRS4 TIAADALMNPFDTVKQRQLQDNTNL - - RVWNVTKQIYQNEGFAAFYYSYPTTLAMNIPFAA 188

Sequence logo  
 4.3bits  
 0.0bits TLIHDAVSNPTFVIKQRMQMYNSKYNVSVISCMKDYRTEGLIQAFYRSYSTQLVMNIPLYQT

bmfrn IHFATYEFFQNMNLHERRYSPVHMVAGGAAGATAAAFTTPLDVVKTLLNTQEN - - - - - 231  
 dmfrn IHFTTYEFFQNMNLERKYNPPVHMAAGAAAGACAAAFTTPLDVVKTLLNTQET - - - - - 231  
 mfrn2 IHLTHITGMASAFRTVYQVGGVTAYFRGVCARVLYQITPSTAIAWSVYEFFKYLITKRQEE 299  
 mfrn1 IHFTTYEFFQEQVNPHTYNSQSHLISGGLAGALAAAFTTPLDVVKTLLNTQENALSLA 273  
 MRS3 INFVIYESSTKFLNPSNEYNPLIHCLCGSISGSTCAAITTPLDCKITVLLQIRGSQTVSL 257  
 MRS4 INFMIYESASKFFNPQNSYNPLIHCLCGSISGATCAAITTPLDCKITVLLQVRGSETVSL 247

Sequence logo  
 4.3bits  
 0.0bits IHFATYEFFQNMNLHERRYSPVHMVAGGAAGATAAAFTTPLDVVKTLLNTQEN - - - - -

bmfrn - - - GLTKMGFEAIRQIYAVAGVKGFFFRGMLARVLYSMPATAICWSTYEFFKFYLAGSNHS 288  
 dmfrn - - - GLTRGMIEASRKIYHMAGPVGFFFRGTTARVLYSMPATAICWSTYEFFKFYLCGLDAD 288  
 mfrn2 HITGHTIGMASAFRTVYQVGGVTAYFRGVCARVLYQITPSTAIAWSVYEFFKYLITKRQEE 359  
 mfrn1 NISGRLSGMANAFRTVYQLNGLAGYFKGIQARVLYQOMPSTAI SWSVYEFFKYFLTKRQEE 333  
 MRS3 EIMRKADTFSKAASAIYQVYGWKGFWRGWKPRIVANMPATAISWTAYECAKHFMTY - - - 314  
 MRS4 EIMKDANTFGRASRAILEVHGWKGFWRGLKPRIVANIPATAISWTAYECAKHFMTY - - - 304

Sequence logo  
 4.3bits  
 0.0bits HITGHTIGMASAFRTVYQVGGVTAYFRGVCARVLYQITPSTAIAWSVYEFFKYLITKRQEE

bmfrn TYKSSIITGKNALQRRDDMVEPAEKTAYVLPVITADAVEELPTSPSATTATAPSSSSAGGA 348  
 dmfrn QYKSSIITGSSE - PRKADYVLPRTTDEEQID - QEREAAKEKDTT - - ATLHSAPTSVNASGA 344  
 mfrn2 WRAGK - - - - - 364  
 mfrn1 NRAPY - - - - - 338  
 MRS3 - - - - - 314  
 MRS4 - - - - - 304

Sequence logo  
 4.3bits  
 0.0bits TYKSSIITGKNALQRRDDMVEPAEKTAYVLPVITADAVEELPTSPSATTATAPSSSSAGGA

bmfrn TAGLAPSSATAIKSVCELPSNVTTALNLHTRHTDVKSTRPFERGFYSSP 397  
 dmfrn - - - - - IKTVCELSTRPAGPTINLHTRHTDVKS - - PYERGFST - 379  
 mfrn2 - - - - - 364  
 mfrn1 - - - - - 338  
 MRS3 - - - - - 314  
 MRS4 - - - - - 304

Sequence logo  
 4.3bits  
 0.0bits TAGLAPSSATAIKSVCELPSNVTTALNLHTRHTDVKSTRPFERGFYSSP

**Figure S1: The putative *Bactrocera dorsalis* mitoferrin (bmfrn) amino acid sequence contains conserved histidine residues required for mitoferrin iron transport function.** Amino acid sequences from mitoferrins of *B. dorsalis* (GI: 751779949, NCBI), fruit fly (*dmfrn*, flybase), yeast (GI: 1008338 and GI: 486507, NCBI) and human (GI: 82775373 and GI: 149274643, NCBI) were aligned using CLC Main Workbench 6.9 (CLC bio, Denmark) using the “very accurate” setting. Conserved histidine residues required for mitoferrin iron transport function<sup>19</sup> are indicated by asterisks.
